# Supplementary material
Source: PubMed Central journal article supplement (PMC2806153)
Supplement: 00118.2009_1.pdf [file 00118.2009_1.pdf]

**Figure 1: supplemental data: Live imaging of EGFP-NKCC1 in MDCK during PMA exposure.**

Cells were cultured as mentioned in Figure 2. Before the experiment the cells were transferred to a Hepes buffered saline solution and mounted on a temperature controlled stage microscope for live imaging. Z-stack images were acquired every minute for 45 min and processed for morphometric analysis (see *Material and Methods*).
